# Supplementary material
Source: PubMed Central journal article supplement (PMC4852287)

SI Figure 1: Ending MD models for  $-SeCH_3$  containing duplexes (sequence **III**). Views into the minor and major grooves (top and bottom panels respectively);  $2'$ - $-SeCH_3$  nucleotide built with S sugar (left panels) and N sugar (right panels). For both duplexes, all other nucleotides were built with an S sugar conformation. The sugars, bases, and backbone for the  $-SeCH_3$  containing nucleotides are in red; the  $SeCH_3$  group (Se=yellow, C=cyan, H=white) are rendered with spheres reflecting their respective van der Waals radius. After simulated melting and annealing, the oligonucleotide built in an overall B-type conformation (left panels) does not properly anneal as exhibited by the extrahelical bases. However, when the same duplex was built with the  $-SeCH_3$  nucleotides in an N sugar conformation and all other nucleotides in S sugar conformations, annealing produces a base paired duplex. In these duplexes, the  $-SeCH_3$  groups are positioned in the minor groove. (right panels)

**Minor groove:**

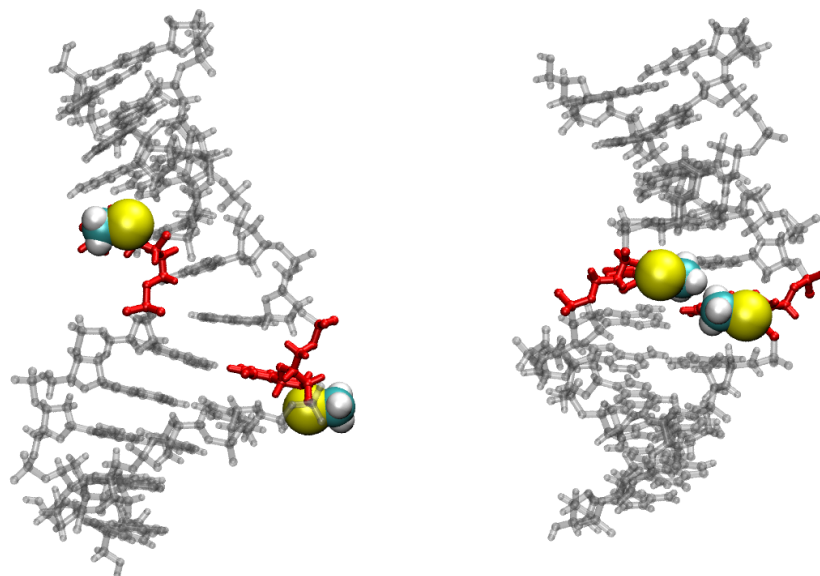

**Major groove:**

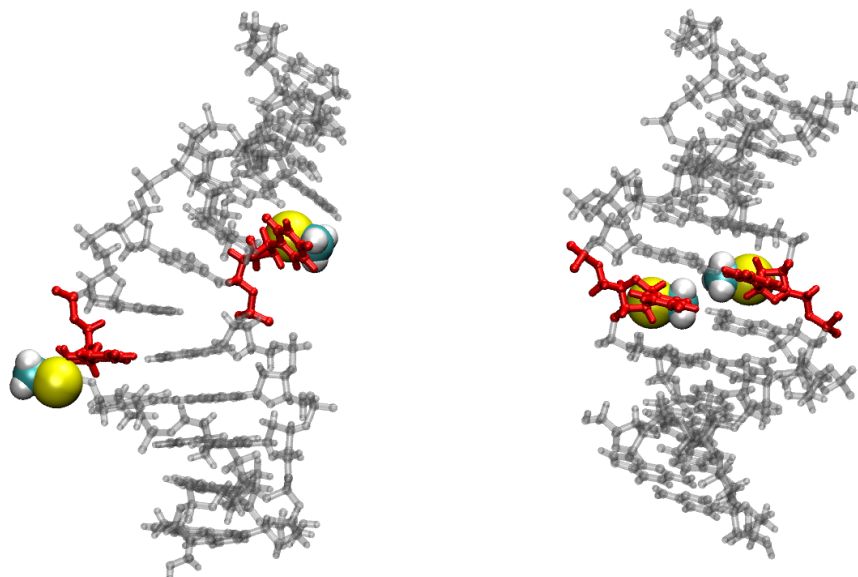

Supplement: NIHMS573240-supplement-Figure_S1.pdf [file NIHMS573240-supplement-Figure_S1.pdf]
